# Supplementary material for: A high-voltage quasi-solid-state flexible supercapacitor with a wide operational temperature range based on a low-cost “water-in-salt” hydrogel electrolyte
Source: Royal Society of Chemistry journal article supplement (doi:10.1039/d0nr08437a), 2021-01-01
Supplement: d0nr08437a1.pdf [file d0nr08437a1.pdf]

Supporting information for:

**High-voltage quasi-solid-state flexible supercapacitor with wide  
operational temperature based on a low-cost “water-in-salt”  
hydrogel electrolyte**

*Yongqi Deng, Hongfei Wang, Kefu Zhang, Jingwen Shao, Jun Qiu, Juan Wu, Yihan*

*Wu, Lifeng Yan\**

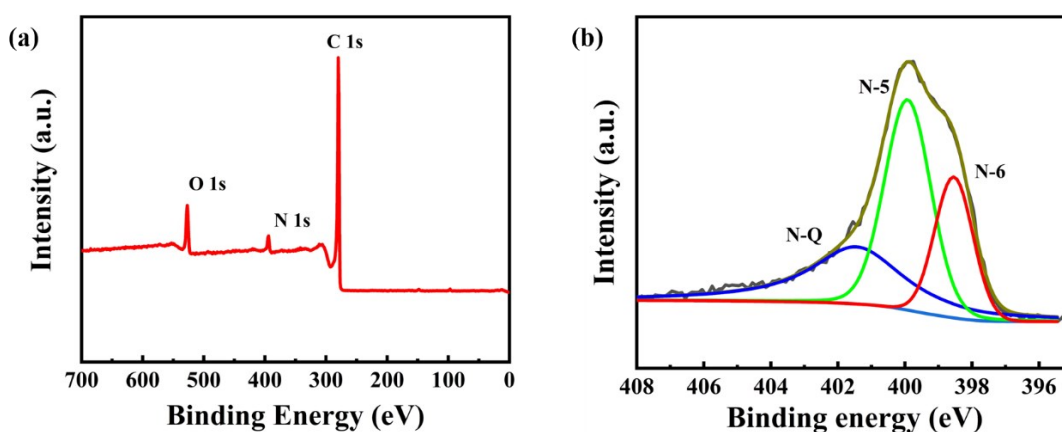

**Figure S1.** XPS survey spectra (a), N 1s pattern (b) of NG.

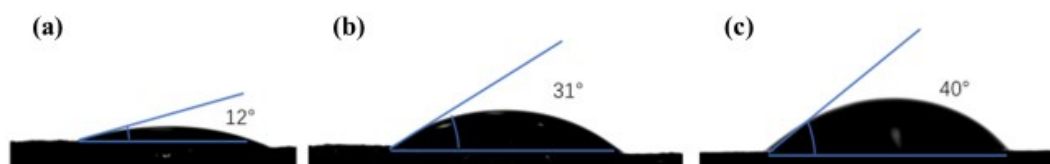

**Figure S2.** The contact angle between NG and 1M CH<sub>3</sub>COOK (a), 24M CH<sub>3</sub>COOK (b), and between AC and 24M CH<sub>3</sub>COOK (c).

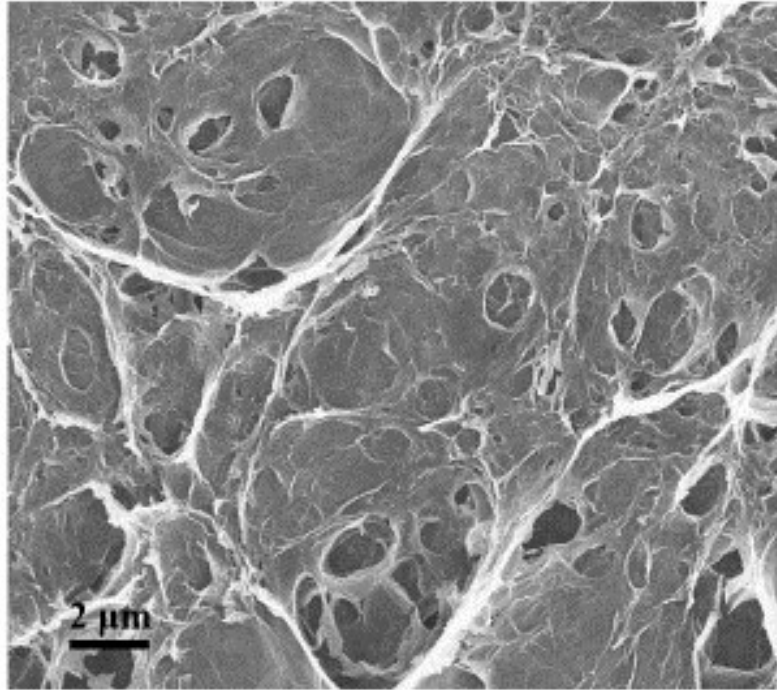

**Figure S3.** SEM image of freeze-dried NG.

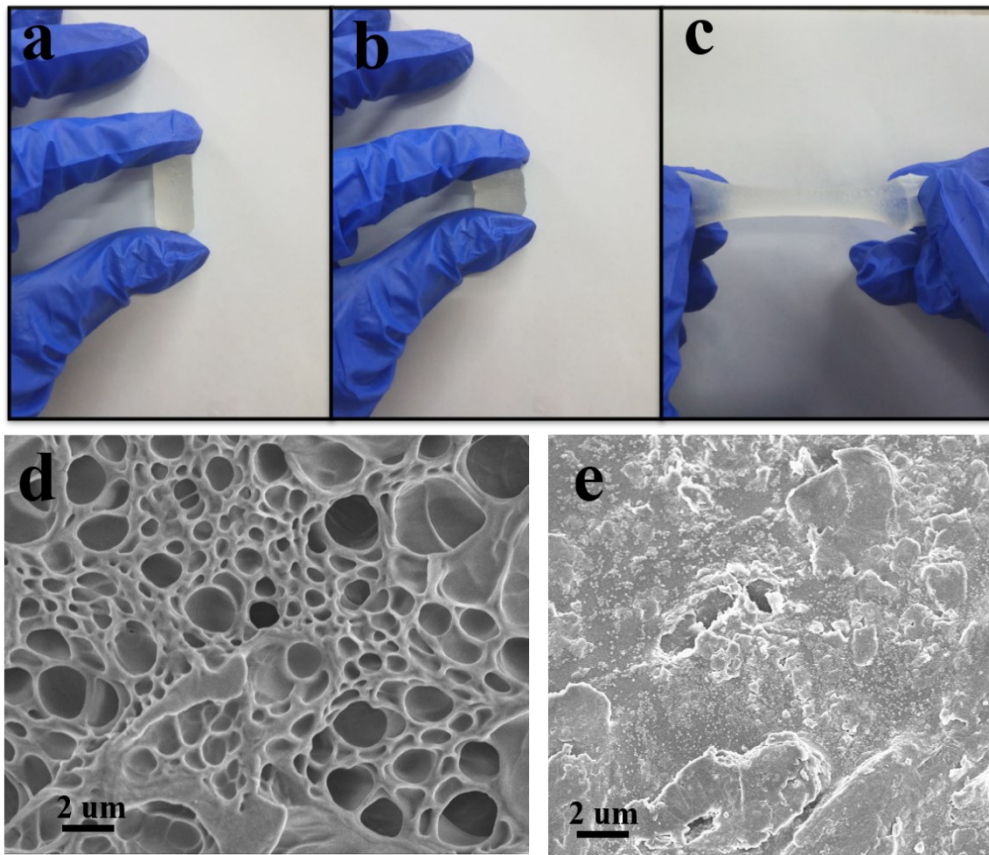

**Figure S4.** Digital photos of the hydrogel electrolyte PAAK/CMC-24M (a, b, c); SEM image of the polyelectrolyte hydrogel PAAK/CMC-water (d) and PAAK/CMC-24M.

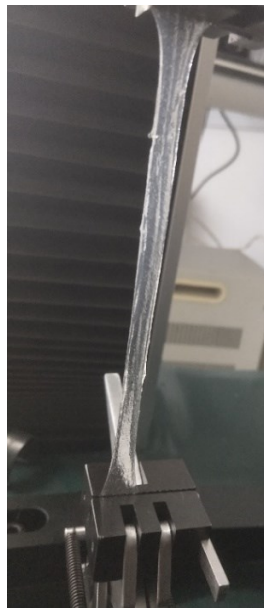

**Figure S5.** Optical image of the stretched PAAK/CMC-24M in the universal tensile testing machine.

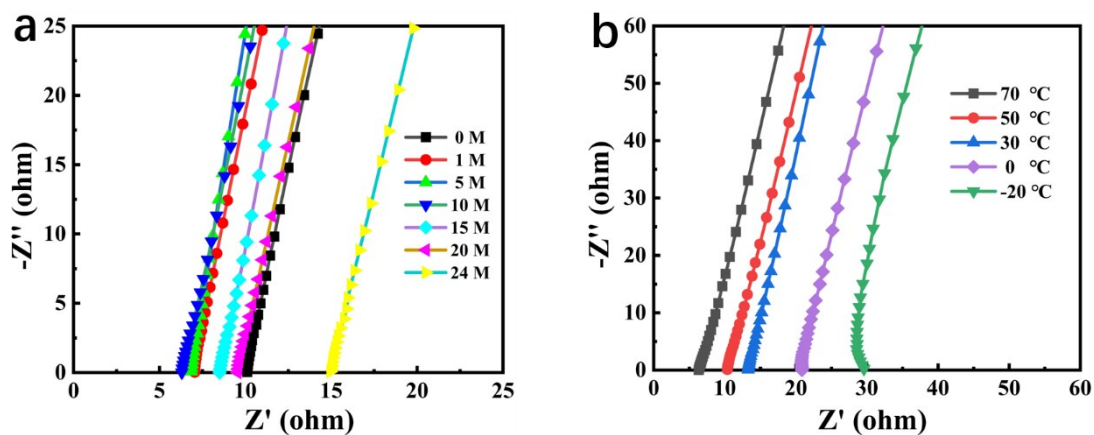

**Figure S6.** The AC impedance spectroscopy of different concentrations of CH<sub>3</sub>COOK (a) and PAAK/CMC-24M from -20 °C to 70 °C (b).

**Table S1.** Comparison of the ionic conductivity between the hydrogel electrolyte in this work and the reported references.

| Hydrogel electrolyte    | Electrolyte concentration | Ionic conductivity       | Ref |
|-------------------------|---------------------------|--------------------------|-----|
| PVA/LiTFSI              | 21 m                      | 6.52 mS cm <sup>-1</sup> | 26  |
| PAAm/LiClO <sub>4</sub> | 1 m                       | 31.1 mS cm <sup>-1</sup> | 31  |
| PAA-g-EG/KOH            | 6 m                       | 6.28 mS cm <sup>-1</sup> | 32  |
| PAAM-LiSO <sub>4</sub>  | 1 m                       | 8 mS cm <sup>-1</sup>    | 30  |
| Chitosan/LiTFSI         | 4 m                       | 13.7 mS cm <sup>-1</sup> | 29  |
| AG/PAAm/LiCl            | 1 m                       | 13.0 mS cm <sup>-1</sup> | 33  |

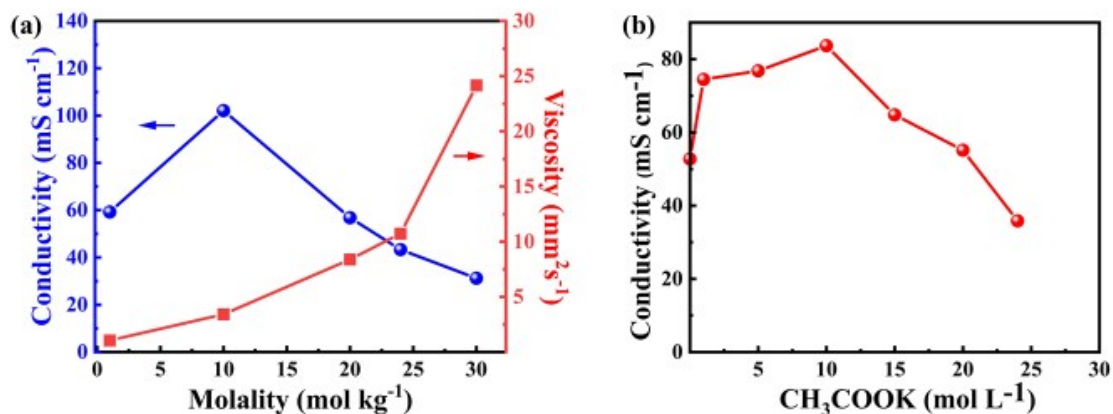

**Figure S7.** The viscosity and ionic conductivity of different concentrations of  $\text{CH}_3\text{COOK}$  (a), PAAK/CMC gel conductivity at different concentrations of  $\text{CH}_3\text{COOK}$  (b).

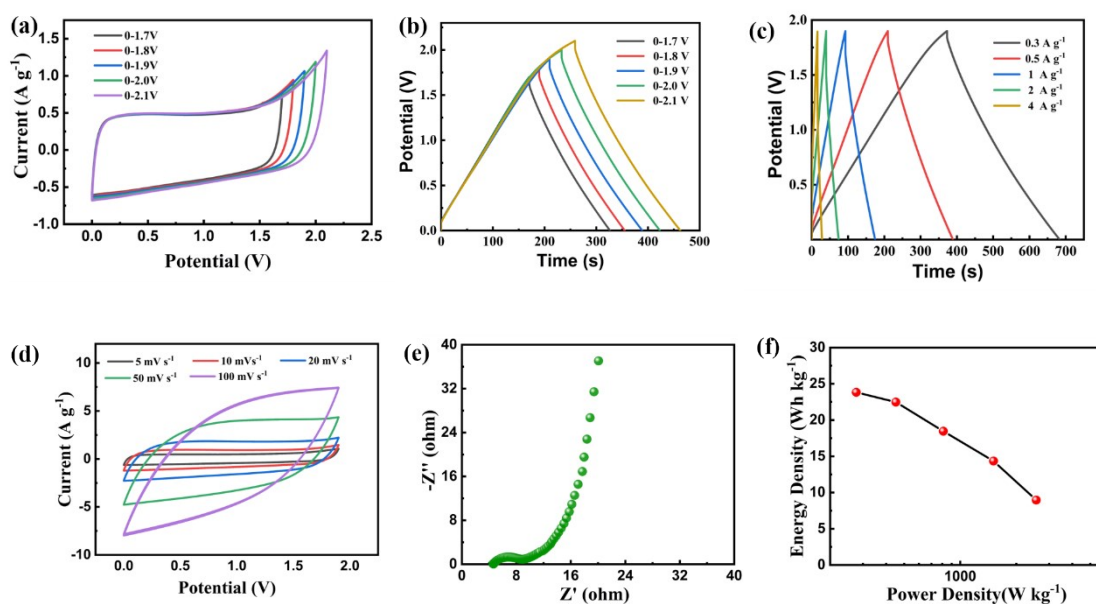

**Figure S8.** CV curves at various voltage windows (a), GCD profiles from 1.7 V -2.1 V at  $0.5 \text{ A g}^{-1}$  (b), GCD profiles from  $0.3 \text{ A g}^{-1}$  to  $4 \text{ A g}^{-1}$  (c), CV curves from  $5 \text{ mV s}^{-1}$  to  $100 \text{ mV s}^{-1}$  (d), EIS (e) and Ragone plot (f) of the assembled aqueous NG//NG EDLC using 24M  $\text{CH}_3\text{COOK}$  electrolyte.

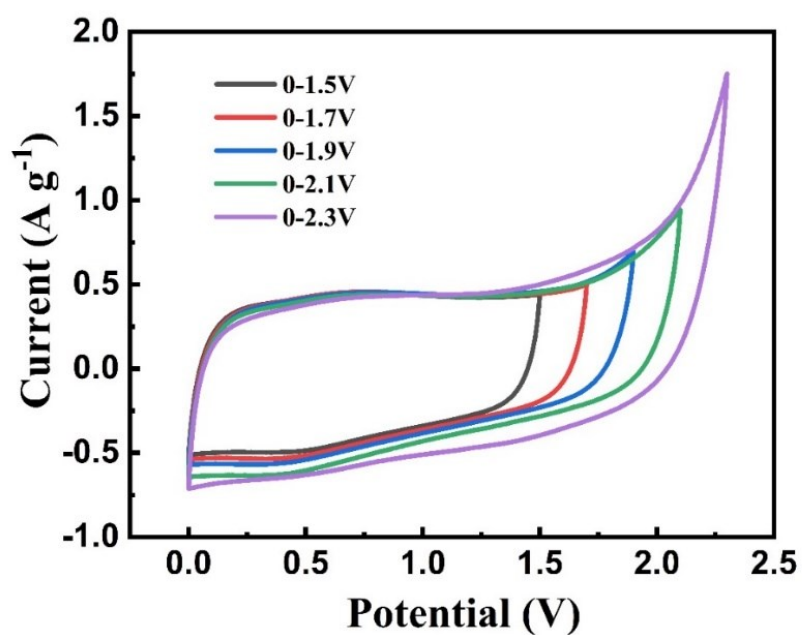

**Figure S9.** Various voltage windows at  $5 \text{ mV s}^{-1}$  of NG//NG all-solid-state supercapacitor with PAAK/CMC-24M polyelectrolyte gel.

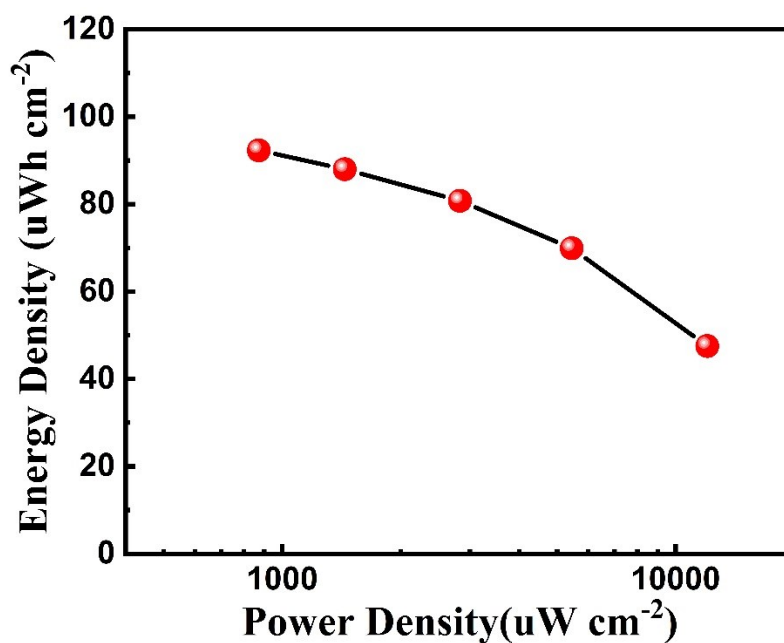

**Figure S10.** Ragone plot based on area of the NG//NG supercapacitor using PAAK/CMC-24M.

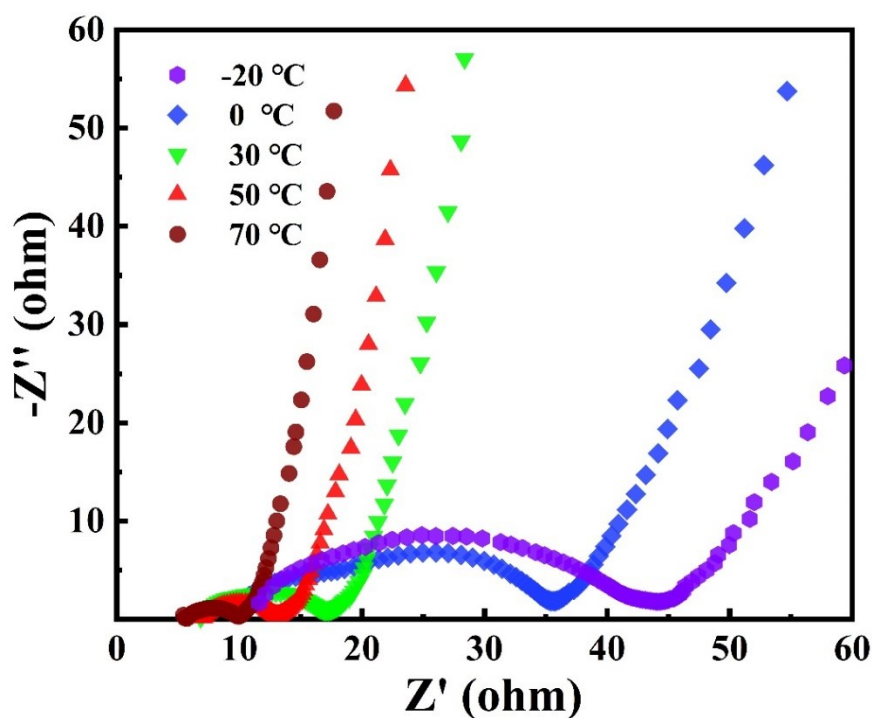

**Figure S11.** Electrochemical impedance spectroscopy of the NG//NG all-solid-state supercapacitor with PAAK/CMC-24M polyelectrolyte hydrogel working at different temperature

**Table S2.** Comparison of the energy densities between our work and the reported references.

| Positive/ Negative electrode        | Electrolyte               | Voltage window (V) | Energy density (W h kg <sup>-1</sup> ) | Power density (kW kg <sup>-1</sup> ) | Ref |
|-------------------------------------|---------------------------|--------------------|----------------------------------------|--------------------------------------|-----|
| Polyaniline-derived carbon nanorods | 21 m LiTFSI               | 2.2 V              | 29.6 W h kg <sup>-1</sup>              | 1100 W h kg <sup>-1</sup>            | 17  |
| N-doped multi-scale porous carbon   | 20 m LiTFSI               | 2.4 V              | 33 W h kg <sup>-1</sup>                | 300 W h kg <sup>-1</sup>             | 32  |
| Activated carbon                    | 17 m NaClO <sub>4</sub>   | 2.3 V              | 23.7 W h kg <sup>-1</sup>              | 1170 W h kg <sup>-1</sup>            | 13  |
| Activated carbon                    | 30 m CH <sub>3</sub> COOK | 2.0 V              | 19.8 W h kg <sup>-1</sup>              | 500 W h kg <sup>-1</sup>             | 20  |
| N/S/O-doped carbon                  | 7 m (gel) LiTFSI          | 2.3 V              | 20.6 W h kg <sup>-1</sup>              | 1150 W h kg <sup>-1</sup>            | 29  |
| Activated carbon                    | 10 m (gel) LiTFSI         | 2.2 V              | 23.5 W h kg <sup>-1</sup>              | 110 W h kg <sup>-1</sup>             | 25  |
